# Supplementary material
Source: PubMed Central journal article supplement (PMC1606584)
Supplement: amjpathol_168_5_1486__1.pdf [file amjpathol_168_5_1486__1.pdf]

**Supplemental Figure 1.** Generation of L-cell clones stably expressing cadherins.

Flow cytometric analysis of L-cell clones stably transfected with cadherin-11 cDNA, E-cadherin cDNA, or control vector (no cadherin). L-cell transfectants were stained with anti-E-cadherin mAb E4.6, anti-cadherin-11 mAb 3H10, or anti-MHC class I mAb. All monoclonal antibodies are mouse IgG1.

**Supplemental Figure 2.** Formation of AJs in FLS.

Intracellular catenins localize to cell-to-cell contacts in cultured FLS. FLS were cultured on cover slips for 3 days and processed for indirect IF microscopy using phalloidin to label F-actin (green) and anti-p120-catenin,  $\beta$ -catenin, or  $\alpha$ -catenin to label AJs. The antibodies to catenins labeled AJs as short parallel lines (red). By contrast, isotype control antibodies did not label AJs.

**Supplemental Figure 3.** Schematic structure of the human cadherin-11-Fc fusion protein.

The five extracellular cadherin domains (CAD1-5) and Fc domains of human IgG1 are depicted as semicircles. Disulfide bonds connect the two chains. The sequence of the extracellular juxta-membrane region of wild-type cadherin-11 and the alterations resulting from fusion with the human Fc region are shown at the joint. Regions corresponding to the Fc portion are shown in bold.
