# Supplementary material
Source: PubMed Central journal article supplement (PMC1606584)
Supplement: amjpathol_168_5_1486__2.pdf [file amjpathol_168_5_1486__2.pdf]

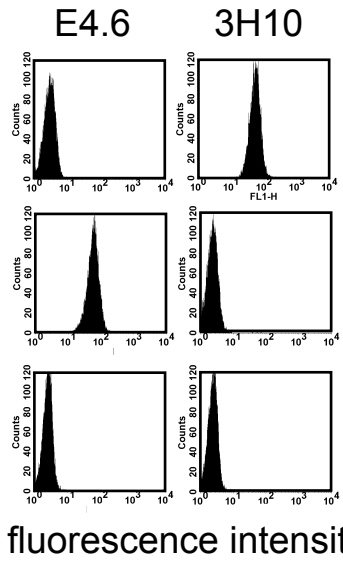

Cadherin-11 L-cells

E-cadherin L-cells

Vector L-cells

fluorescence intensity

phalloidin    primary Ab    merge

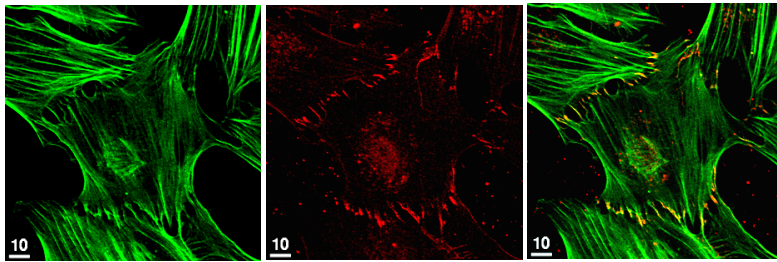

p120-catenin

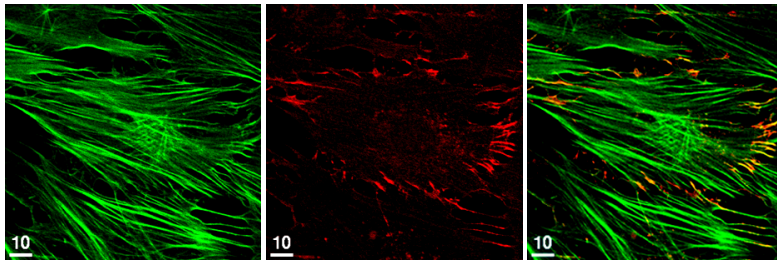

$\beta$ -catenin

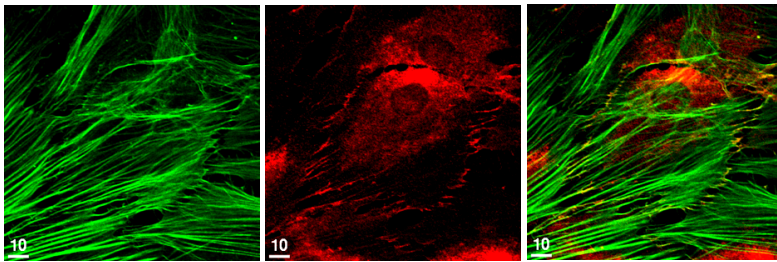

$\alpha$ -catenin

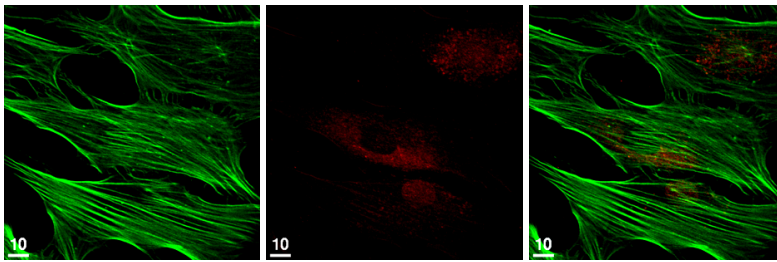

estrogen-R $\beta$   
(control)

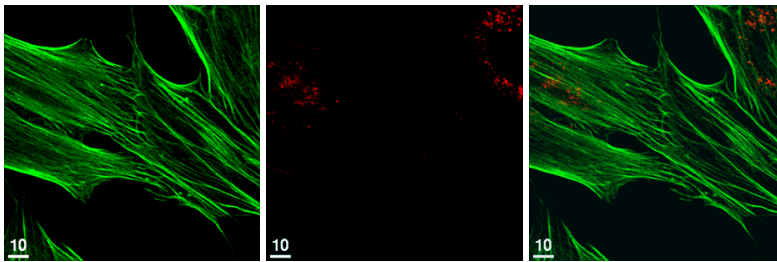

E-cadherin  
(E4.6, control)

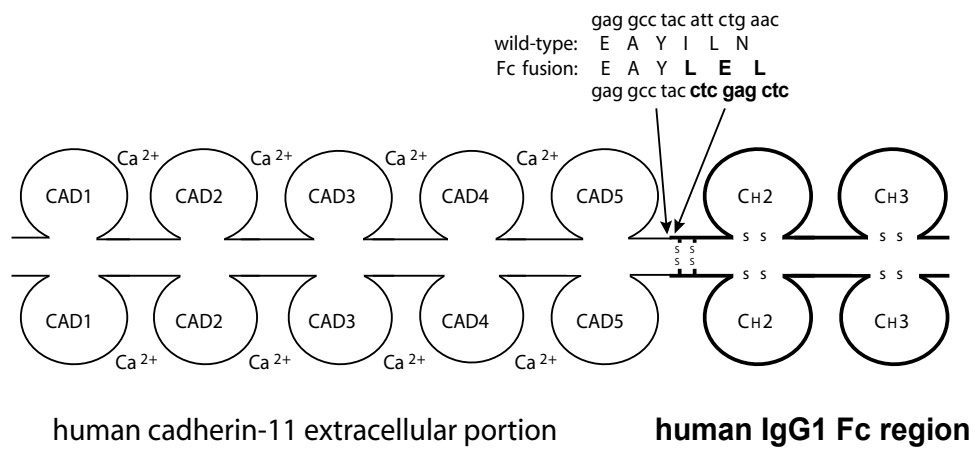

Supplemental Figure 3
